# Supplementary material for: On the nucleation of graphene by chemical vapor deposition
Source: Royal Society of Chemistry journal article supplement (doi:10.1039/c1nj20695h), 2011-10-10
Supplement: c1nj20695h.pdf [file c1nj20695h.pdf]

## Supplementary Data

### On the nucleation of graphene in chemical vapor deposition

Baoshan Hu,<sup>\*a,b</sup> Hiroki Ago,<sup>b,c</sup> Carlo M. Orofeo,<sup>c</sup> Yui Ogawa<sup>c</sup> and Masaharu Tsuji<sup>b,c</sup>

<sup>\*</sup>To whom correspondence should be addressed: [hubaoshan@cqu.edu.cn](mailto:hubaoshan@cqu.edu.cn).

<sup>a</sup>School of Chemistry and Chemical Engineering, Chongqing University, P.R.China;

<sup>b</sup>Institute for Materials Chemistry and Engineering, Kyushu University, Japan;

<sup>c</sup>Graduate School of Engineering Sciences, Kyushu University, Japan.

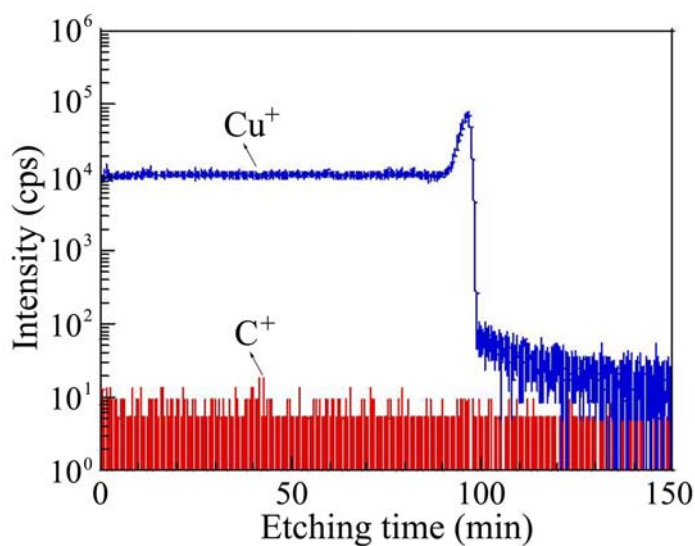

**Fig. S-1** SIMS analysis of C<sup>+</sup> and Cu<sup>+</sup> species as a function of etching time for the as-sputtered Cu film deposited on c-plane Al<sub>2</sub>O<sub>3</sub>. The data shows that the 500 μm thick Cu film is almost etched away after 100 min, and signal of C<sup>+</sup> species is at a minimum level. We also studied C<sup>-</sup> species, which is more sensitive than C<sup>+</sup>, but only minimum level C<sup>-</sup> was detected (not shown here).

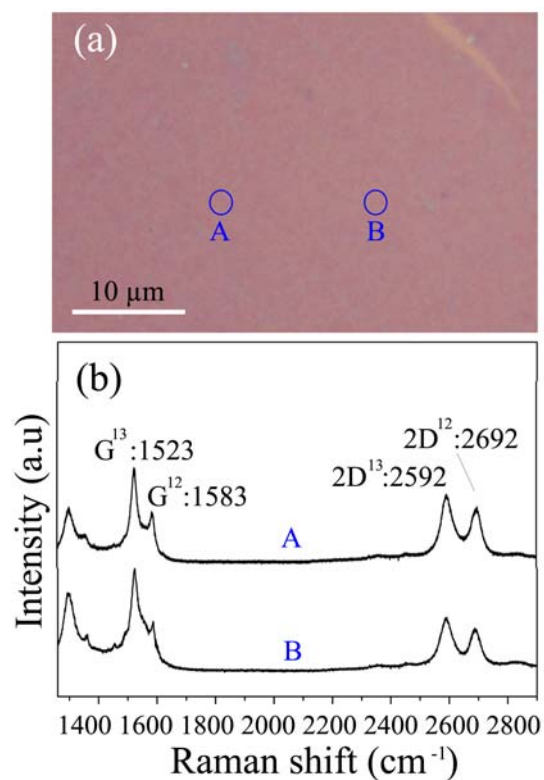

**Fig. S-2** (a) Optical micrograph of transferred graphene film from the Cu/c-plane Al<sub>2</sub>O<sub>3</sub> with the <sup>13</sup>CH<sub>4</sub>-CVD at 900°C (<sup>13</sup>CH<sub>4</sub>/H<sub>2</sub>/Ar = 20/20/400 sccm). (b) Representative Raman spectra measured at 2 random points of graphene film (a), which indicate the separated <sup>12</sup>C- and <sup>13</sup>C-graphene domains. This suggests the different <sup>12</sup>C source from the gas-supplied <sup>13</sup>CH<sub>4</sub>.
